# Supplementary material for: Optically active multi-helical erythrocyte-like Ln(OH)CO3 (Ln = La, Ce, Pr and Sm)
Source: Royal Society of Chemistry journal article supplement (doi:10.1039/c6cp02302a), 2016-01-01
Supplement: c6cp02302a1.pdf [file c6cp02302a1.pdf]

**Electronic Supplementary Information**

**Optically active multi-helical erythrocyte-like Ln(OH)CO<sub>3</sub> (Ln= La, Ce, Pr and Sm)**

*Jing Chen, Songmei Li\*, Juan Du, Bo Wang, Shiming Meng, Jianhua Liu and Mei Yu*

Key Laboratory of Aerospace advanced materials and performance of Ministry of Education, School of Materials Science and Engineering, Beihang University, Beijing, 100191, P. R. China.

\*Corresponding author. TEL: +86 10 82317103.

E-mail address: songmei\_li@buaa.edu.cn

## Experimental section

### Materials

Lanthanide nitrate hexahydrate (Ln= La, Ce, Pr and Sm), L-Aspartic acid sodium (L-AspNa), sodium carbonate ( $\text{Na}_2\text{CO}_3$ ) and sodium hydroxide (NaOH) were purchased and used as received.

### Preparation of RBCs $\text{LnCO}_3\text{OH}$

The preparation process was based on our previous report.<sup>1</sup> Typically, 1.5 mmol  $\text{Na}_2\text{CO}_3$  was dissolved in 10 ml deionized water, then 10ml mixture solution (6 mmol L-AspNa and 2 mmol  $\text{Ln}(\text{NO}_3)_3 \cdot 6\text{H}_2\text{O}$  (Ln= La, Ce, Pr and Sm)) was dropped into the above solution and stirred vigorously for 1 h. After that, 6 ml 1M NaOH was added to the above mixture dropwise. After stirring for another 3h, the resulting suspension was transferred into a 30 mL autoclave and treated at 160 °C for 48 h. The as-prepared products were washed with deionized water and ethanol successively and stay overnight at 60 °C in air.

### Characterization

The crystallographic phases of the as-synthesized samples were performed on a Rikagu D/max 2200PC, with Cu K $\alpha$  radiation ( $\lambda = 1.5406 \text{ \AA}$ ). The morphology of the as-prepared samples was characterized by FE-SEM (FEI SIRION) and transmission electron microscopy (JEOL 2010 FEG). To obtain a cross section of the RBCs-LnCs, a thin-section with the thickness of 70 nm were prepared on a Leica EM UC6 Ultramicrotome with a diamond knife. Diffuse reflectance ultraviolet visible (DRUV) spectra was recorded by a Shimadzu UV-3600 spectropolarimeter at room temperature. DRCD spectra were recorded by a JASCO J-815 spectropolarimeter at room temperature. The photoluminescence measurements were carried out on an F-4500 spectrofluorometer (Hitachi Japan) at room temperature.

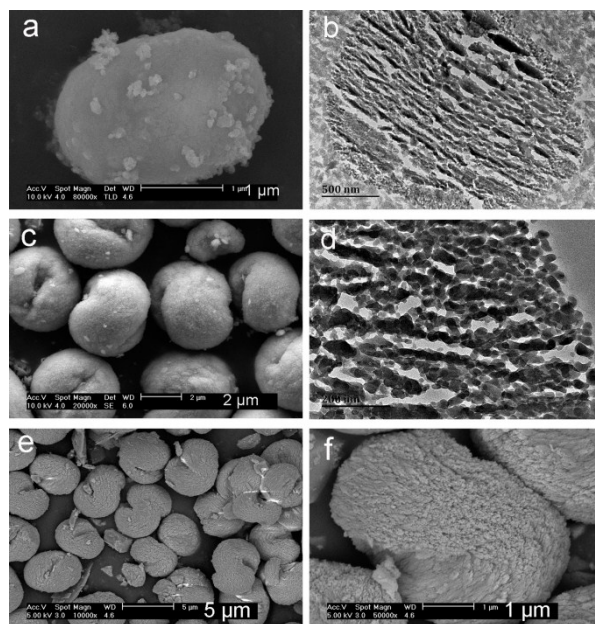

**Figure S1.** SEM images (a) and TEM images (b) of RBCs-LnCs, SEM images (c) and TEM images (d) of RBCs-PrCs, SEM images (e, f) of RBCs-SmCs.

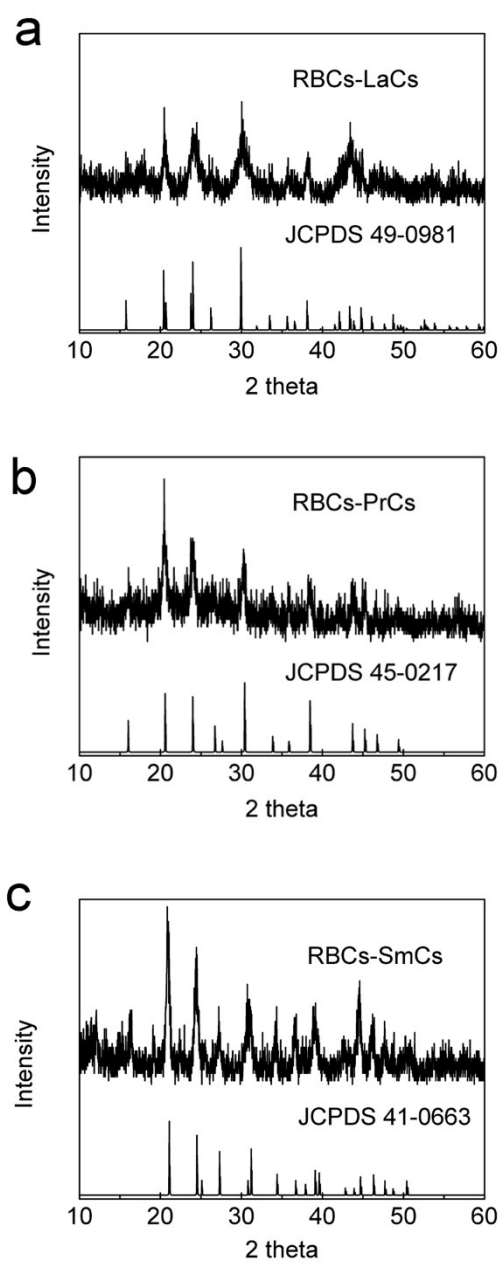

**Figure S2.** XRD patterns of (a) RBCs-LaCs, (b) RBCs-PrCs and (c) RBCs-SmCs.

**Table S1.** Assignments of peaks in the DRUV-vis spectra of RBCs-LnCs (Ln= La, Pr and Sm).

| sample    | Wavelength/nm | Transition                          |
|-----------|---------------|-------------------------------------|
| RBCs-LaCs | 214           | $O^{2-} \rightarrow La^{3+},^2$     |
| RBCs-PrCs | 217           | $O^{2-} \rightarrow Pr^{3+},^2$     |
|           | 446           | $^3H_4 \rightarrow ^3P_2^3$         |
|           | 472           | $^3H_4 \rightarrow ^3P_1, ^1I_6^3$  |
|           | 488           | $^3H_4 \rightarrow ^3P_0^3$         |
|           | 590           | $^3H_4 \rightarrow ^1D_2^3$         |
| RBCs-SmCs | 210           | $O^{2-} \rightarrow Sm^{3+},^2$     |
|           | 404           | $^6H_{5/2} \rightarrow ^6P_{3/2}^4$ |
|           | 472           | $^6H_{5/2} \rightarrow ^4G_{7/2}^4$ |

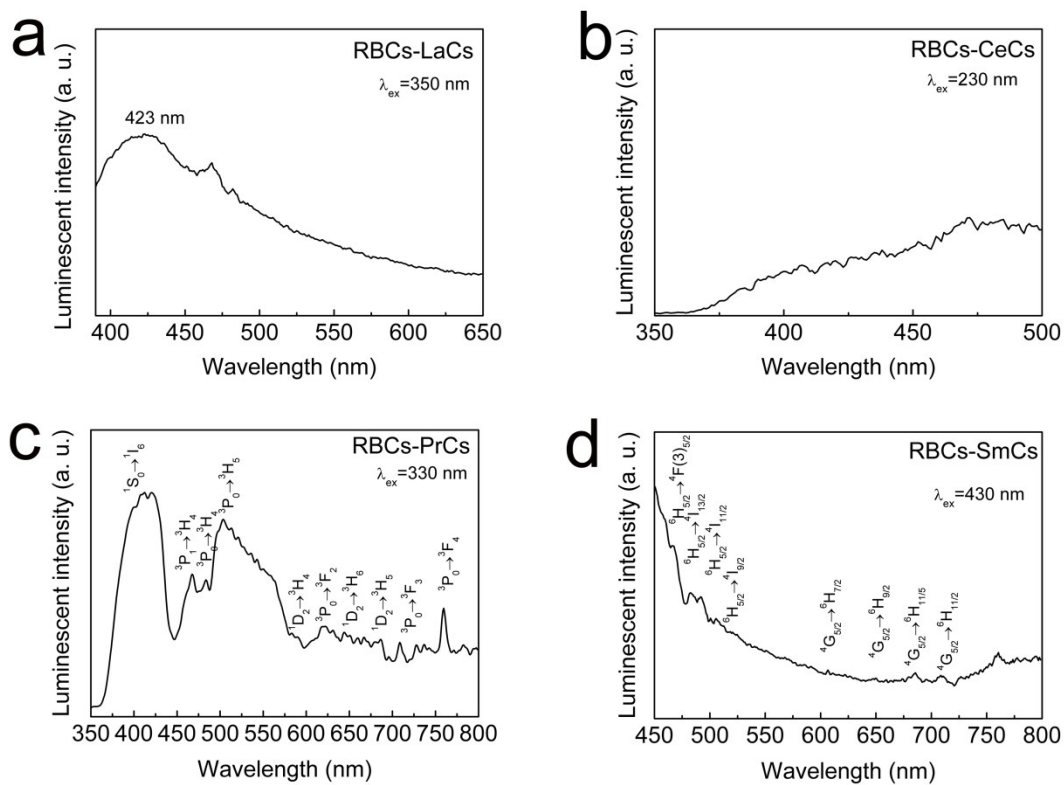

Figure S3. Emission spectra of RBCs-LnCs (Ln= La, Ce, Pr and Sm).

Table S2. Assignment of the transitions in the emission spectra of RBCs-LnCs (Ln= Pr and Sm).

| sample    | Wavelength/nm | Transition                              |
|-----------|---------------|-----------------------------------------|
| RBCs-PrCs | 407.6         | $^1S_0 \rightarrow ^1I_{6,5,6}$         |
|           | 468.6         | $^3P_1 \rightarrow ^3H_{4,5,6}$         |
|           | 486.6         | $^3P_0 \rightarrow ^3H_{4,7}$           |
|           | 504.6         | $^3P_0 \rightarrow ^3H_{5,7}$           |
|           | 586.6         | $^1D_2 \rightarrow ^3H_{4,7}$           |
|           | 622.6         | $^3P_0 \rightarrow ^3F_{2,8}$           |
|           | 644.6         | $^1D_2 \rightarrow ^3H_{6,9}$           |
|           | 684.6         | $^1D_2 \rightarrow ^3H_{5,7}$           |
|           | 708.6         | $^3P_0 \rightarrow ^3F_{3,7}$           |
|           | 759.6         | $^3P_0 \rightarrow ^3F_{4,8}$           |
| RBCs-SmCs | 467.6         | $^6H_{5/2} \rightarrow ^4F(3)_{5/2,10}$ |
|           | 482.6         | $^6H_{5/2} \rightarrow ^4I_{13/2,10}$   |
|           | 491.6         | $^6H_{5/2} \rightarrow ^4I_{11/2,11}$   |
|           | 505.6         | $^6H_{5/2} \rightarrow ^4I_{9/2,11}$    |
|           | 606.6         | $^4G_{5/2} \rightarrow ^6H_{7/2,12}$    |
|           | 649.6         | $^4G_{5/2} \rightarrow ^6H_{9/2,12}$    |
|           | 685.6         | $^4G_{5/2} \rightarrow ^6H_{11/5,7}$    |
|           | 708.6         | $^4G_{5/2} \rightarrow ^6H_{11/2,12}$   |
|           | 760.6         | not assignalbe                          |

1. J. Chen, S. Li, J. Du, J. Liu, M. Yu, S. Meng and B. Wang, *RSC Adv.*, 2015, **5**, 64261-64267.
2. R. Velchuri, S. Palla, G. Ravi, N. K. Veldurthi, J. R. Reddy and M. Vithal, *J. Rare Earth.*, 2015, **33**, 837-845.
3. V. K. Tripathi, S. K. Saroj and R. Nagarajan, *J. Fluorine Chem.*, 2015, **175**, 22-27.
4. M. Machida, J. Yabunaka and T. Kijima, *Chem. Mater.*, 2000, **12**, 812-817.
5. Q. Y. Zhang and X. Y. Huang, *Prog. Mater. Sci.*, 2010, **55**, 353-427.
6. F.-S. Kao and T.-M. Chen, *J. Solid State Chem.*, 2001, **156**, 84-87.
7. R. F. D'Vries, G. E. Gomez, J. H. Hodak, G. J. Soler-Illia and J. Ellena, *Dalton. Trans.*, 2016, **45**, 646-656.
8. A. Stanulis, A. Katelnikovas, M. Van Bael, A. Hardy, A. Kareiva and T. Justel, *J. Lumin.*, 2016, **172**, 323-330.
9. E. van der Kolk, P. Dorenbos and C. W. E. van Eijk, *Opt. Commun.*, 2001, **197**, 317-326.
10. C. V. Reddy, Y. N. Ahammed, R. R. Reddy and T. V. R. Rao, *J. Phys. Chem. Solid.*, 1998, **59**, 337-346.
11. A. Nag and T. R. Narayanan Kutty, *J. Mater. Chem.*, 2003, **13**, 370-376.
12. M. Ayvaci, A. Ege and N. Can, *Opt. Mater.*, 2011, **34**, 138-142.
